# Supplementary figures and images for: Irregular model DNA particles self-assemble into a regular structure
Source: Royal Society of Chemistry journal article supplement (doi:10.1039/c7sm01627a), 2017-01-01

$a$

$b$

$10^{-1}$

$10^{-1}$

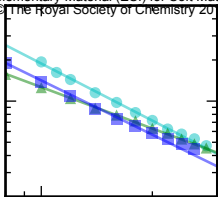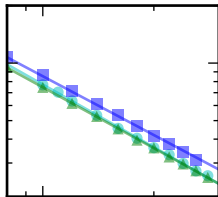

$10^1$

0.06

0.04

0.02

0.00

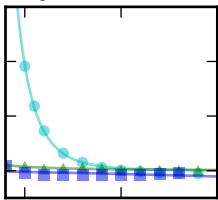

$\phi^{\min}$

120

108

90

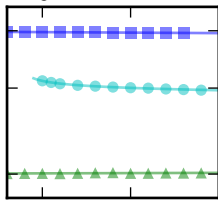

10

20

30

$w$

10

20

30

$w$

Supplement: c7sm01627a2.pdf [file c7sm01627a2.pdf]
